# Supplementary material for: Designed synthesis of MOR zeolites using gemini-type bis(methylpyrrolidinium) dications as structure directing agents and their DME carbonylation performance
Source: Royal Society of Chemistry journal article supplement (doi:10.1039/d2ta00451h), 2022-01-01
Supplement: d2ta00451h1.pdf [file d2ta00451h1.pdf]

## Supporting Information

### Designed Synthesis of MOR Zeolites using Gemini-type Bis(methylpyrrolidinium)

#### Dications as Structure Directing Agents and Their DME Carbonylation

#### Performance

Nan Chen<sup>ab</sup>, Jin Zhang<sup>ab</sup>, Yating Gu<sup>ab</sup>, Wenna Zhang<sup>a</sup>, Kaipeng Cao<sup>ab</sup>, Wenhao Cui<sup>ab</sup>,

Shutao Xu<sup>a</sup>, Dong Fan<sup>\*a</sup>, Peng Tian<sup>\*a</sup>, Zhongmin Liu<sup>ab</sup>

<sup>a</sup> National Engineering Laboratory for Methanol to Olefins, Dalian National Laboratory for Clean Energy, Dalian Institute of Chemical Physics, Chinese Academy of Sciences, Dalian 116023, China

<sup>b</sup> University of Chinese Academy of Sciences, Chinese Academy of Sciences, Beijing 100049, China

\*Corresponding authors :

E-mail addresses: fandong08@dicp.ac.cn (Dong Fan); tianpeng@dicp.ac.cn (Peng Tian).

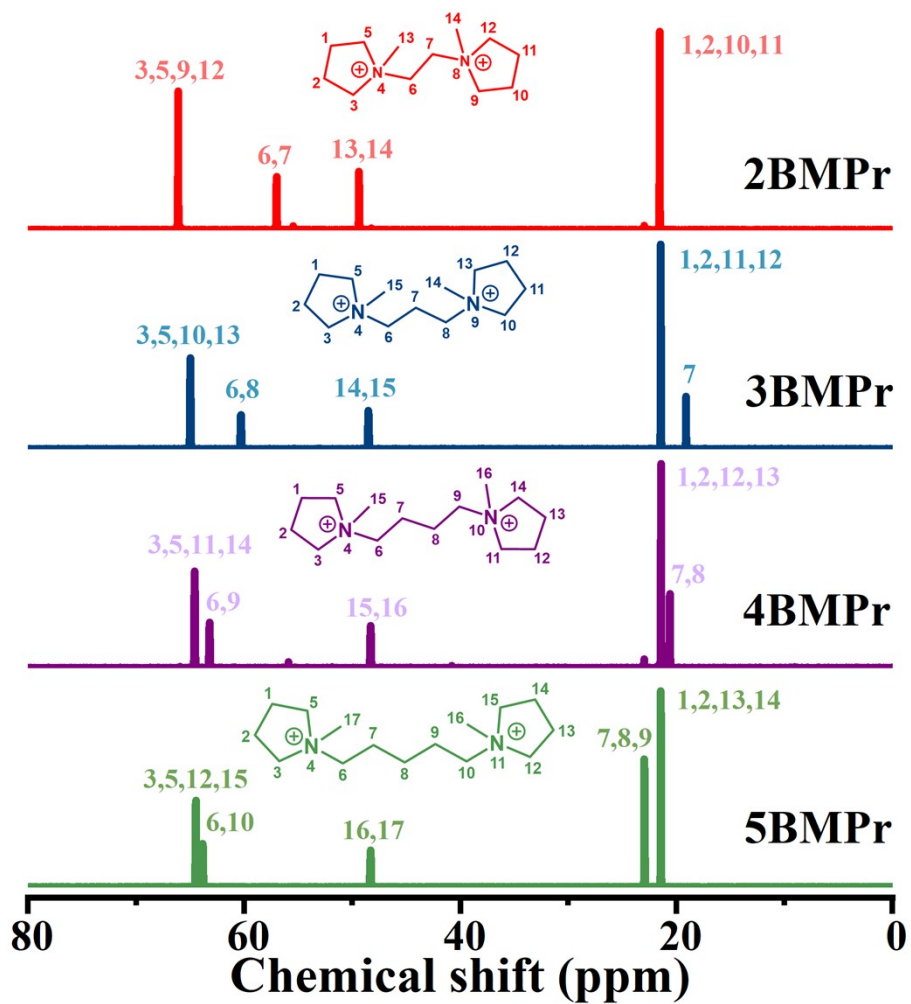

Fig. S1 The  $^{13}\text{C}$  NMR spectra of the four organic dications solvated in  $\text{D}_2\text{O}$ .

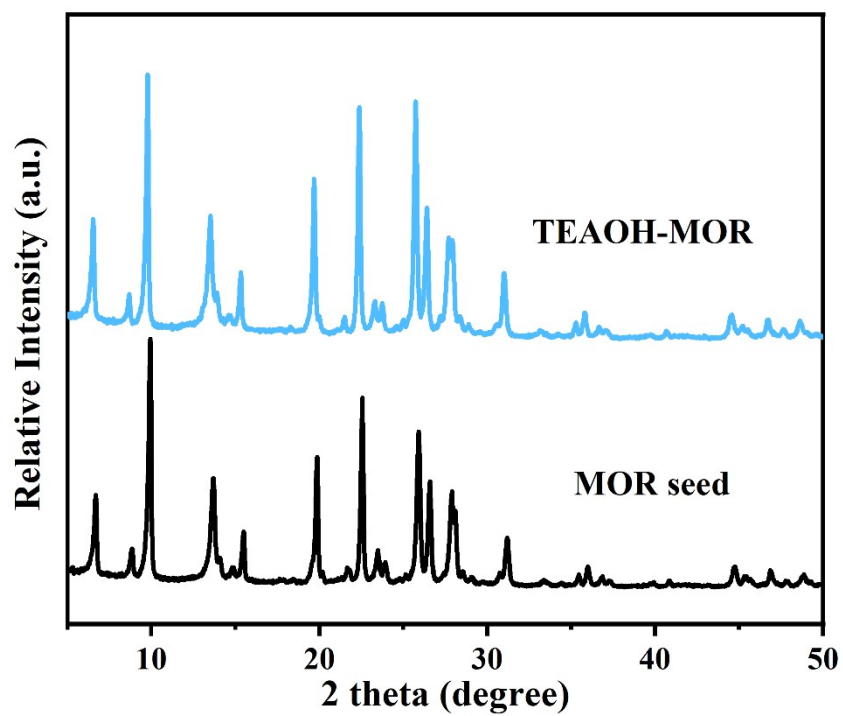

**Fig. S2** XRD patterns of the seed and reference samples.

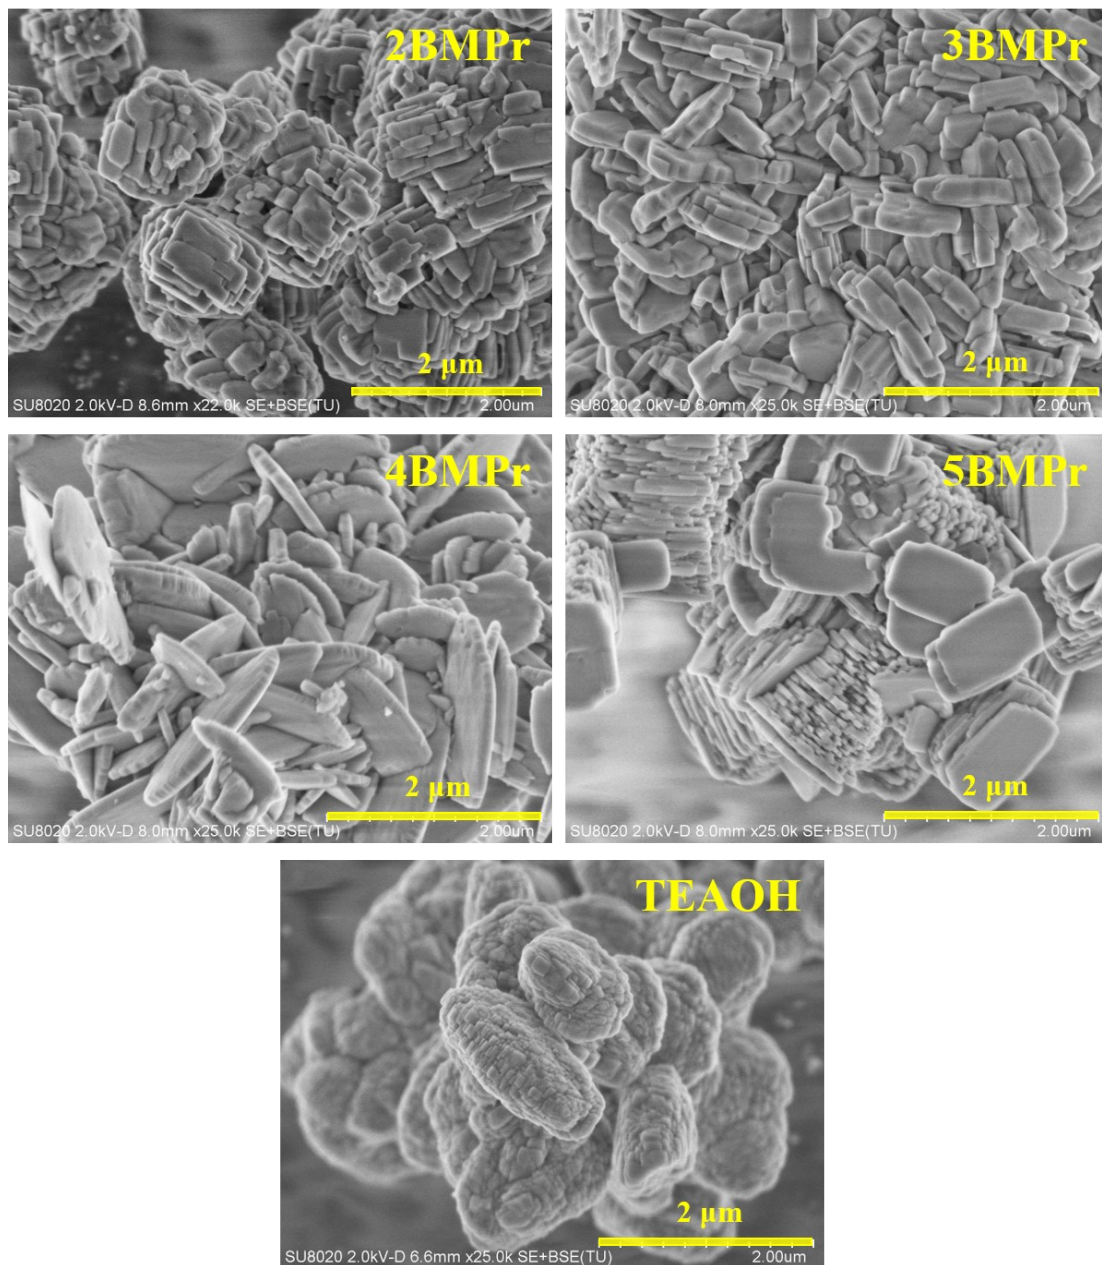

**Fig. S3** SEM images of the as-synthesized MOR samples.

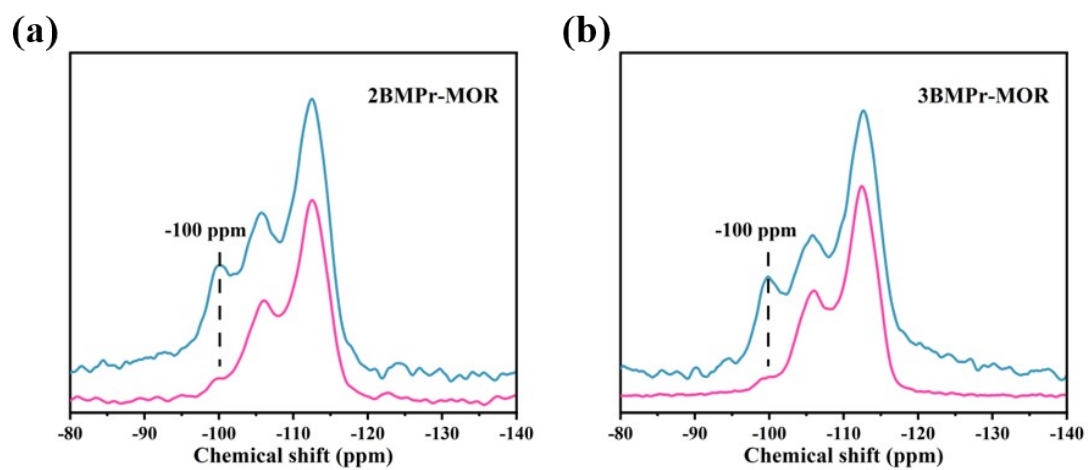

**Fig. S4** The  $^{29}\text{Si}$  MAS NMR (pink) and  $^1\text{H}$ - $^{29}\text{Si}$  CP MAS NMR spectra (blue) of the as-synthesized samples: (a) 2BMPPr-MOR, (b) 3BMPPr-MOR.

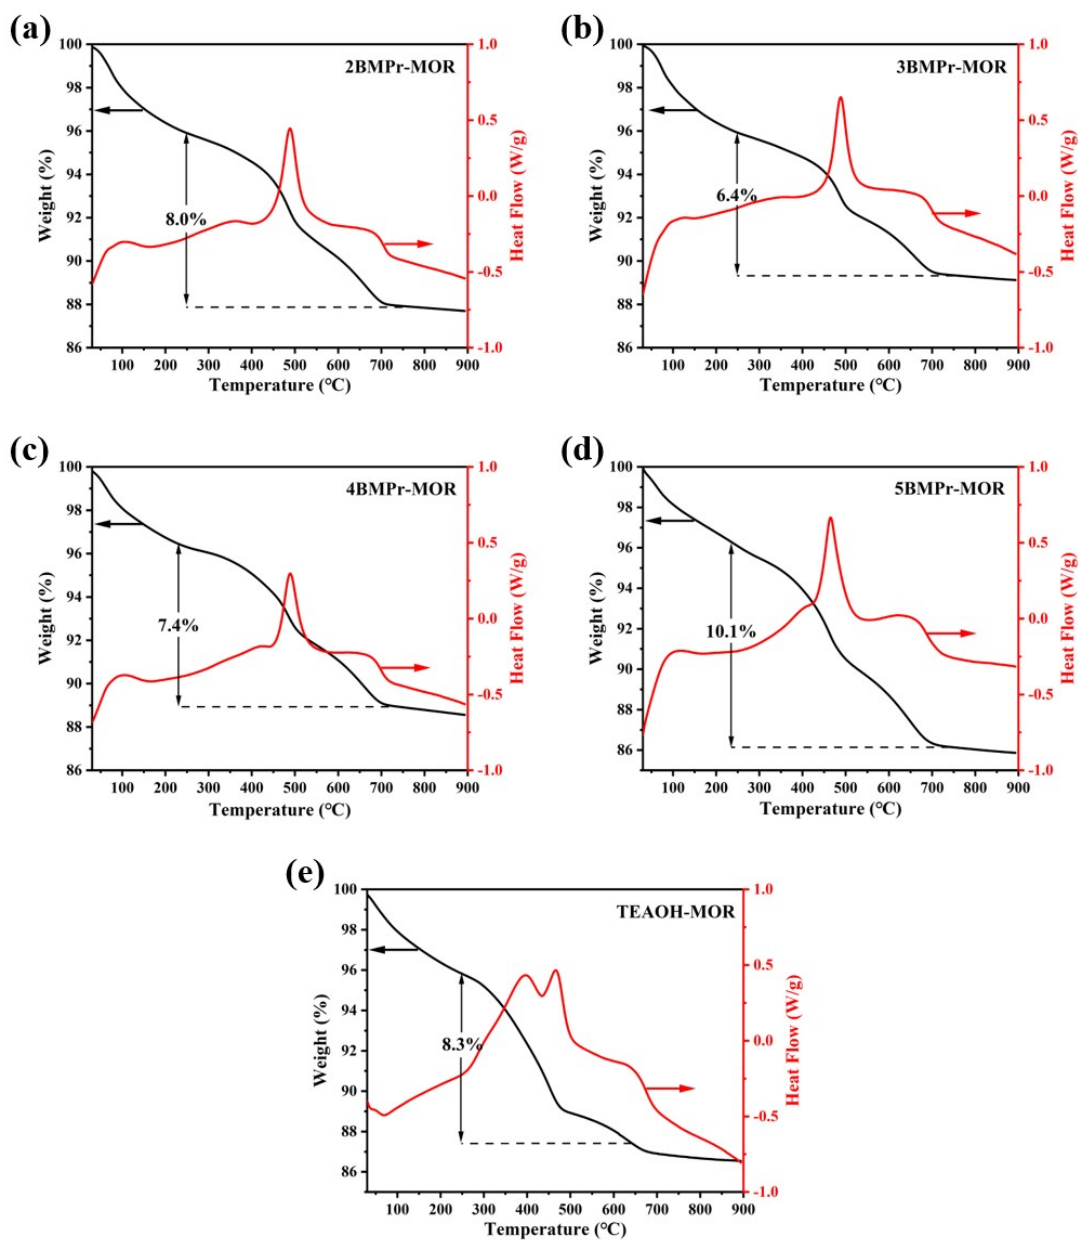

**Fig. S5** Thermal analysis of the as-synthesized MOR samples: (a) 2BMPPr-MOR, (b) 3BMPPr-MOR, (c) 4BMPPr-MOR, (d) 5BMPPr-MOR, (e) TEAOH-MOR.

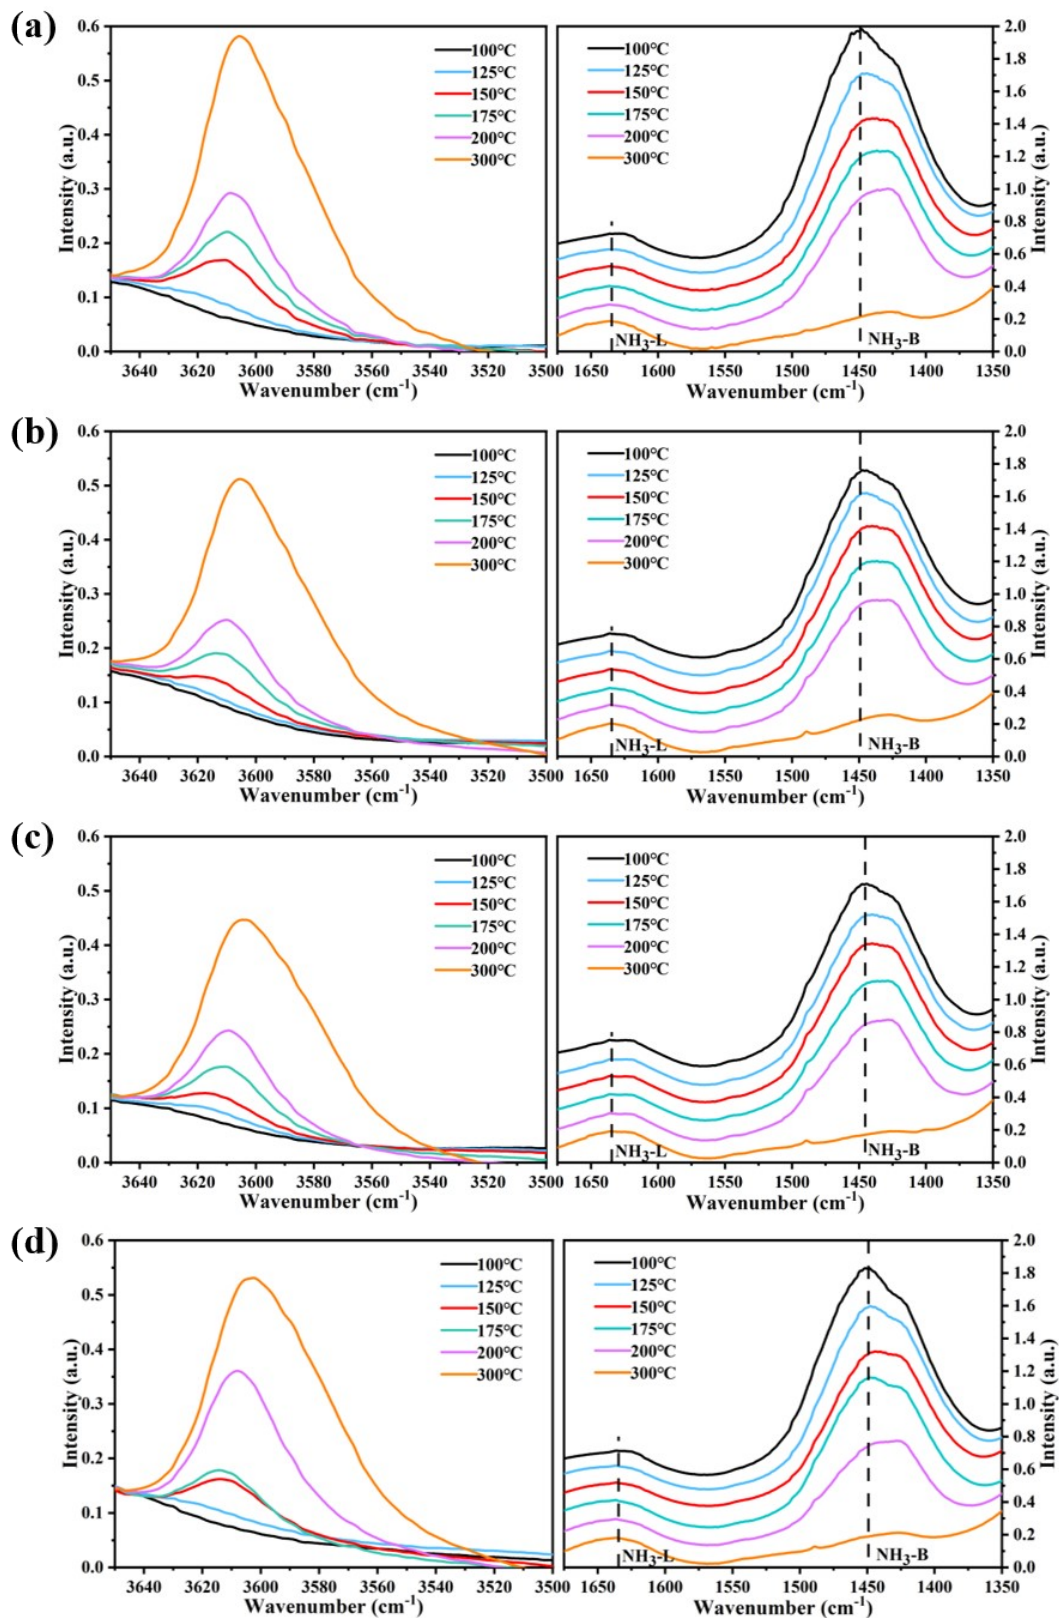

**Fig. S6**  $\text{NH}_3$ -adsorbed FTIR spectra of H-MOR samples after  $\text{NH}_3$  desorption at different temperatures: (a) 2BMP<sub>r</sub>-MOR, (b) 3BMP<sub>r</sub>-MOR, (c) 4BMP<sub>r</sub>-MOR, (d) TEAOH-MOR.



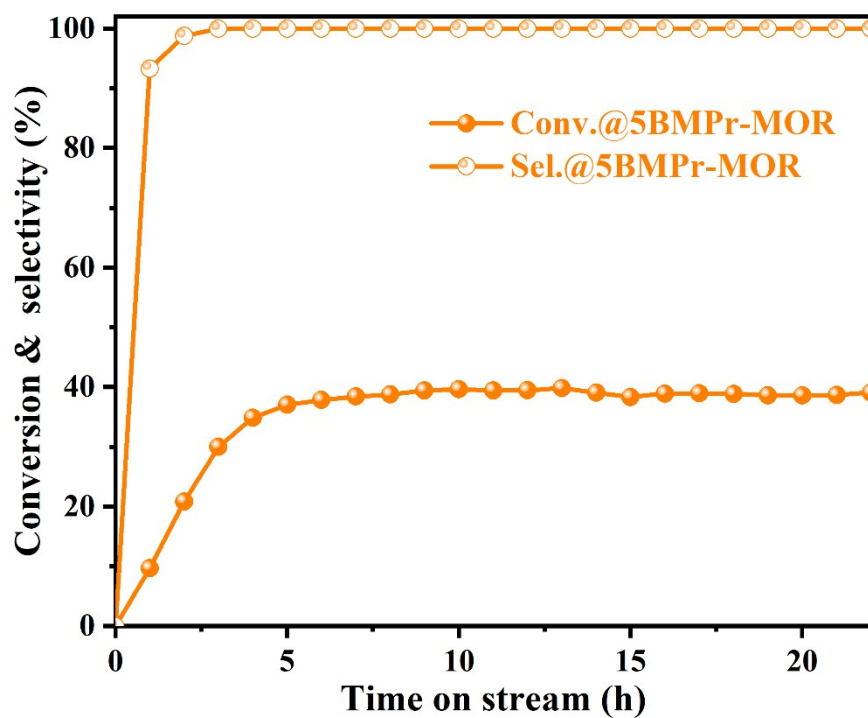

**Fig. S7** The catalytic performance of DME carbonylation over 5BMPPr-MOR. Reaction conditions: 200 °C, 2 MPa, DME/CO/N<sub>2</sub> = 5/35/60, GHSV = 7200 mL/g/h.



**Table S1.** Synthesis results for MOR zeolites using nBMPPr [n=2, 3, 4, 5].

| SDA           | Gel molar composition <sup>a</sup>               |                                    | Times(days)     | product          |                  | Solid yield <sup>c</sup><br>(%) |      |
|---------------|--------------------------------------------------|------------------------------------|-----------------|------------------|------------------|---------------------------------|------|
|               | SiO <sub>2</sub> /Al <sub>2</sub> O <sub>3</sub> | Na <sub>2</sub> O/SiO <sub>2</sub> |                 | Phase            | SAR <sup>b</sup> |                                 |      |
| <b>2BMPPr</b> | 22                                               | 0.18                               | 2               | MOR              | 10.2             | 92                              |      |
|               |                                                  | 0.2                                | 2               | MOR              | 9.5              | 84                              |      |
|               | 26                                               | 0.18                               | 2               | MOR              | 12.0(12.4)       | 86                              |      |
|               |                                                  | 0.2                                | 2               | MOR              | 10.5             | 76                              |      |
|               | 30                                               | 0.2                                | 2               | MOR (amorphous)  |                  |                                 |      |
|               |                                                  |                                    | 2.5             | MOR              | 12.9             | 85                              |      |
|               |                                                  |                                    | 3               | MOR              | 12.4             | 83                              |      |
|               | 34                                               | 0.2                                | 2               | Amorphous        |                  |                                 |      |
|               |                                                  |                                    | 2.5             | MOR+Quartz       |                  |                                 |      |
|               | <b>3BMPPr</b>                                    | 22                                 | 0.2             | 2                | MOR              | 9.4                             | 82   |
| 0.18          |                                                  |                                    | 2               | MOR              | 11.9(12.0)       | 84                              |      |
| 26            |                                                  | 0.2                                | 2               | MOR              | 10.9             | 85                              |      |
|               |                                                  |                                    | 3               | MOR+ANA          |                  |                                 |      |
|               |                                                  |                                    | 4               | MOR+Quartz       |                  |                                 |      |
|               |                                                  |                                    | 28              | 0.2              | 2                | MOR                             | 12.1 |
| 30            |                                                  | 0.2                                | 2.5             | MOR              | 11.9             | 78                              |      |
|               |                                                  |                                    | 2               | Amorphous        |                  |                                 |      |
|               |                                                  |                                    | 2.5             | MOR              | 12.4             | 82                              |      |
|               |                                                  |                                    | 3               | MOR+ZSM-5        |                  |                                 |      |
| 34            | 0.2                                              | 2                                  | Amorphous       |                  |                  |                                 |      |
|               |                                                  | 2.5                                | MOR+Nu-6        |                  |                  |                                 |      |
|               |                                                  | 3                                  | MOR+Quartz      |                  |                  |                                 |      |
| <b>4BMPPr</b> | 26                                               | 0.18                               | 5               | Amorphous        |                  |                                 |      |
|               |                                                  | 0.24                               | 2               | Amorphous        |                  |                                 |      |
|               | 30                                               | 0.18                               | 5               | Amorphous        |                  |                                 |      |
|               |                                                  | 0.2                                | 4               | MOR+ZSM-5        |                  |                                 |      |
|               |                                                  | 0.22                               | 3               | Amorphous        |                  |                                 |      |
|               | 32                                               | 0.18                               | 0.24            | 4                | MOR              | 9.7                             | 65   |
|               |                                                  |                                    | 4.5             | Amorphous        |                  |                                 |      |
|               |                                                  |                                    | 5               | MOR              | 12.1(12.0)       | 73                              |      |
| <b>5BMPPr</b> | 26                                               | 0.16                               | 5.5             | MOR+ZSM-5        |                  |                                 |      |
|               |                                                  |                                    | 4               | Amorphous        |                  |                                 |      |
|               |                                                  |                                    | 5               | MOR+ZSM-5        |                  |                                 |      |
|               | 30                                               | 0.18                               | 3               | Amorphous        |                  |                                 |      |
|               |                                                  |                                    | 4               | MOR+ZSM-5+SSZ-24 |                  |                                 |      |
|               |                                                  |                                    | 3               | MOR+ZSM-5        |                  |                                 |      |
| 30            | 0.22                                             | 0.2                                | 2               | MOR              | 9.6(9.4)         | 64                              |      |
|               |                                                  | 0.24                               | 2               | MOR              | 8.6              | 55                              |      |
|               |                                                  | 0.18                               | 5               | MOR+ZSM-5+ZSM-57 |                  |                                 |      |
|               | 0.24                                             | 2                                  | MOR+ZSM-5+SUZ-4 |                  |                  |                                 |      |

|    |      |   |                 |
|----|------|---|-----------------|
| 32 | 0.18 | 5 | MOR+ZSM-5+SUZ-4 |
| 34 | 0.24 | 2 | Amorphous       |

<sup>a</sup> Gel molar composition: H<sub>2</sub>O/SiO<sub>2</sub>=15, OSDA/SiO<sub>2</sub>=0.12, seed addition: 6 wt% relative to SiO<sub>2</sub> resource; crystallization temperature: 180 °C. The SAR (Si/Al ratio) of MOR seed are 12.9 derived from XRF.

<sup>b</sup> The SAR was derived from XRF and the value in the bracket was calculated from <sup>29</sup>Si MAS NMR.

<sup>c</sup> The yield was calculated based on the mass of silica and alumina.

**Table S2.** OSDA stabilization energy for the four dications used in this work.

| OSDA              | OSDA stabilization energy (kJ/mol Si) <sup>a</sup> |
|-------------------|----------------------------------------------------|
| 2BMP <sub>r</sub> | -5.01                                              |
| 3BMP <sub>r</sub> | -4.85                                              |
| 4BMP <sub>r</sub> | -4.80                                              |
| 5BMP <sub>r</sub> | -4.60                                              |

<sup>a</sup> OSDA stabilization energy (nBMP<sub>r</sub>) = E(total) - E(zeolite) - E(nBMP<sub>r</sub>).

**Table S3.** Summary of the product STY in the MOR-catalyzed DME carbonylation reaction.

| Literature      | Reaction conditions |            |          |               | STY of MA<br>(mmol/h/g) | Pyridine<br>modification |
|-----------------|---------------------|------------|----------|---------------|-------------------------|--------------------------|
|                 | DME : CO (%)        | T (°C)     | P (MPa)  | GHSV (mL/g/h) |                         |                          |
| [1]             | 2:93                | 165        | 1        | 12024         | 1.9                     |                          |
| [2]             | 5:50                | 200        | 1        | 1250          | 0.8                     | Yes                      |
| [3]             | 5:50                | 200        | 1        | 1250          | 1.7                     |                          |
| [4]             | 3:95.5              | 210        | 1.5      | 5280          | 4.0                     |                          |
| [5]             | 5:35                | 200        | 2        | 1500          | 1.3                     |                          |
| [6]             | 1:47                | 200        | 1.5      | 4500          | 1.8                     |                          |
| [7]             | 5:35                | 200        | 3        | 1500          | 2.8                     |                          |
| [8]             | 2.4:50              | 210        | 2        | 2100          | 3.2                     |                          |
| [9]             | 1:49                | 200        | 1.5      | 6000          | 1.6                     |                          |
| [10]            | 5:50                | 200        | 1        | 1250          | 1.3                     |                          |
| [11]            | 5:35                | 200        | 2        | 1500          | 3.0                     | Yes                      |
| [12]            | 1:47                | 200        | 1.5      | 3000          | 1.1                     | Yes                      |
| [13]            | 5:76                | 200        | 1        | 2500          | 2.5                     |                          |
| [14]            | 1:49                | 200        | 1.5      | 6000          | 1.6                     |                          |
| [15]            | 2:98                | 190        | 2        | 2000          | 1.8                     |                          |
| [16]            | 3:95.5              | 190        | 1.5      | 2640          | 2.8                     |                          |
| [17]            | 5:35                | 200        | 2        | 3600          | 7.2                     | Yes                      |
| [18]            | 1:49                | 200        | 1.5      | 6000          | 6.5                     |                          |
| [19]            | 1:49                | 200        | 1.5      | 6000          | 7.2                     |                          |
| [20]            | 1:49                | 200        | 1.5      | 6000          | 6.4                     |                          |
| [21]            | 5:35                | 200        | 2        | 2250          | 4.5                     |                          |
| [22]            | 5:35                | 200        | 2        | 3600          | 6.8                     | Yes                      |
| [23]            | 5:35                | 200        | 2        | 3600          | 6.4                     | Yes                      |
| <b>Our work</b> | <b>5:35</b>         | <b>200</b> | <b>2</b> | <b>7200</b>   | <b>12.5</b>             | <b>Yes</b>               |

## References

1. A. Bhan, A. D. Allian, G. J. Sunley, D. J. Law and E. Iglesia, *Journal of the American Chemical Society*, 2007, 129, 4919-4924.
2. J. Liu, H. Xue, X. Huang, P.-H. Wu, S.-J. Huang, S.-B. Liu and W. Shen, *Chinese Journal of Catalysis*, 2010, 31, 729-738.
3. H. Xue, X. Huang, E. Zhan, M. Ma and W. Shen, *Catalysis Communications*, 2013, 37, 75-79.
4. Y. Liu, N. Zhao, H. Xian, Q. Cheng, Y. Tan, N. Tsubaki and X. Li, *ACS Applied Materials & Interfaces*, 2015, 7, 8398-8403.
5. Y. Yuan, L. Wang, H. Liu, P. Tian, M. Yang, S. Xu and Z. Liu, *Chinese Journal of Catalysis*, 2015, 36, 1910-1919.
6. H. Zhan, S. Huang, Y. Li, J. Lv, S. Wang and X. Ma, *Catalysis Science & Technology*, 2015, 5, 4378-4389.
7. H. Zhou, W. Zhu, L. Shi, H. Liu, S. Liu, S. Xu, Y. Ni, Y. Liu, L. Li and Z. Liu, *Catalysis Science & Technology*, 2015, 5, 1961-1968.
8. A. A. C. Reule and N. Semagina, *ACS Catalysis*, 2016, 6, 4972-4975.
9. M. Wang, S. Huang, J. Lu, Z. Cheng, Y. Li, S. Wang and X. Ma, *Chinese Journal of Catalysis*, 2016, 37, 1530-1538.
10. M. Ma, X. Huang, E. Zhan, Y. Zhou, H. Xue and W. Shen, *Journal of Materials Chemistry A*, 2017, 5, 8887-8891.
11. L. Li, Q. Wang, H. Liu, T. Sun, D. Fan, M. Yang, P. Tian and Z. Liu, *ACS Applied Materials & Interfaces*, 2018, 10, 32239-32246.
12. Y. Li, Q. Sun, S. Huang, Z. Cheng, K. Cai, J. Lv and X. Ma, *Catalysis Today*, 2018, 311, 81-88.
13. M. Ma, E. Zhan, X. Huang, N. Ta, Z. Xiong, L. Bai and W. Shen, *Catalysis Science & Technology*, 2018, 8, 2124-2130.
14. Y. Li, S. Huang, Z. Cheng, K. Cai, L. Li, E. Milan, J. Lv, Y. Wang, Q. Sun and X. Ma, *Applied Catalysis B: Environmental*, 2019, 256, 117777.
15. X. Wang, R. Li, C. Yu, Y. Liu, L. Liu, C. Xu, H. Zhou and C. Lu, *Industrial & Engineering Chemistry Research*, 2019, 58, 18065-18072.
16. N. Zhao, Q. Cheng, S. Lyu, L. Guo, Y. Tian, T. Ding, J. Xu, X. Ma and X. Li, *Catalysis Today*, 2020, 339, 86-92.
17. K. Cao, D. Fan, L. Li, B. Fan, L. Wang, D. Zhu, Q. Wang, P. Tian and Z. Liu, *ACS Catalysis*, 2020, 10, 3372-3380.
18. P. He, Y. Li, K. Cai, X. Xiong, J. Lv, Y. Wang, S. Huang and X. Ma, *ACS Applied Nano Materials*, 2020, 3, 6460-6468.
19. Y. Li, M. Yu, K. Cai, M. Wang, J. Lv, R. F. Howe, S. Huang and X. Ma, *Physical Chemistry Chemical Physics*, 2020, 22, 11374-11381.
20. S. Liu, Z. Cheng, Y. Li, J. Sun, K. Cai, S. Huang, J. Lv, S. Wang and X. Ma, *Industrial & Engineering Chemistry Research*, 2020, 59, 13861-13869.
21. S. Liu, H. Liu, X. Ma, Y. Liu, W. Zhu and Z. Liu, *Catalysis Science & Technology*, 2020, 10, 4663-4672.

22. K. Cao, D. Fan, S. Zeng, B. Fan, N. Chen, M. Gao, D. Zhu, L. Wang, P. Tian and Z. Liu, *Chinese Journal of Catalysis*, 2021, 42, 1468-1477.
23. K. Cao, D. Fan, M. Gao, B. Fan, N. Chen, L. Wang, P. Tian and Z. Liu, *ACS Catalysis*, 2022, 12, 1-7.
24. J. Datka, B. Gil and A. Kubacka, *Zeolites*, 1995, 15, 501-506.
